# Supplementary material for: In Silico Elucidation of the Molecular Mechanism Defining the Adverse Effect of Selective Estrogen Receptor Modulators
Source: PLoS Comput Biol. 2007 Nov 30;3(11):e217. doi: 10.1371/journal.pcbi.0030217 (PMC2098847; doi:10.1371/journal.pcbi.0030217)
Supplement: Table S2 — Top-ranked proteins that belong to the nuclear receptor fold are not listed because they share the same fold as the template ERα (1.0 MB TIF) [file pcbi.0030217.st002.doc]

**Table S2. Top ten off-fold hits other than SERCA found by searching the ER ligand binding site using SOIPPA. Top ranked proteins that belong to the nuclear receptor fold are not listed because they share the same fold as the template ER**

| **PDB Id** | **Protein** | **p-value** |
| --- | --- | --- |
| 2OCC | Heart Cytochrome C oxidase | 1.1e-3 |
| 2HR7 | Insulin receptor | 2.2e-2 |
| 1TT1 | Glutamate receptor, ionotropic kainate 2 | 2.7e-2 |
| 1ZOP | Integin CD11A | 2.7e-2 |
| 1O9K | Retinoblastoma tumor suppressor protein | 3.2e-2 |
| 2HK5 | Rubrerythrin | 3.8e-2 |
| 1Z5W | Tubulin gamma-1 | 6.2e-2 |
| 2P3G | MAP kinase-activated protein kinase 2 | 7.8e-2 |
| 1TAZ | Nucleotide phosphodiesterase B | 1.0e-1 |
| 1RXT | Glycylpeptide N-tetradecanoyl transferase | 1.1e-1 |
